# Supplementary material for: Simultaneous measurement of intrinsic promoter and enhancer potential reveals principles of functional duality and regulatory reciprocity
Source: Research Square preprint supplement (doi:10.21203/rs.3.rs-6363545/v1), 2025-05-13
Supplement: Supplementary file 1 [file dddc70901e1ae1c84b3f8d34.pdf]

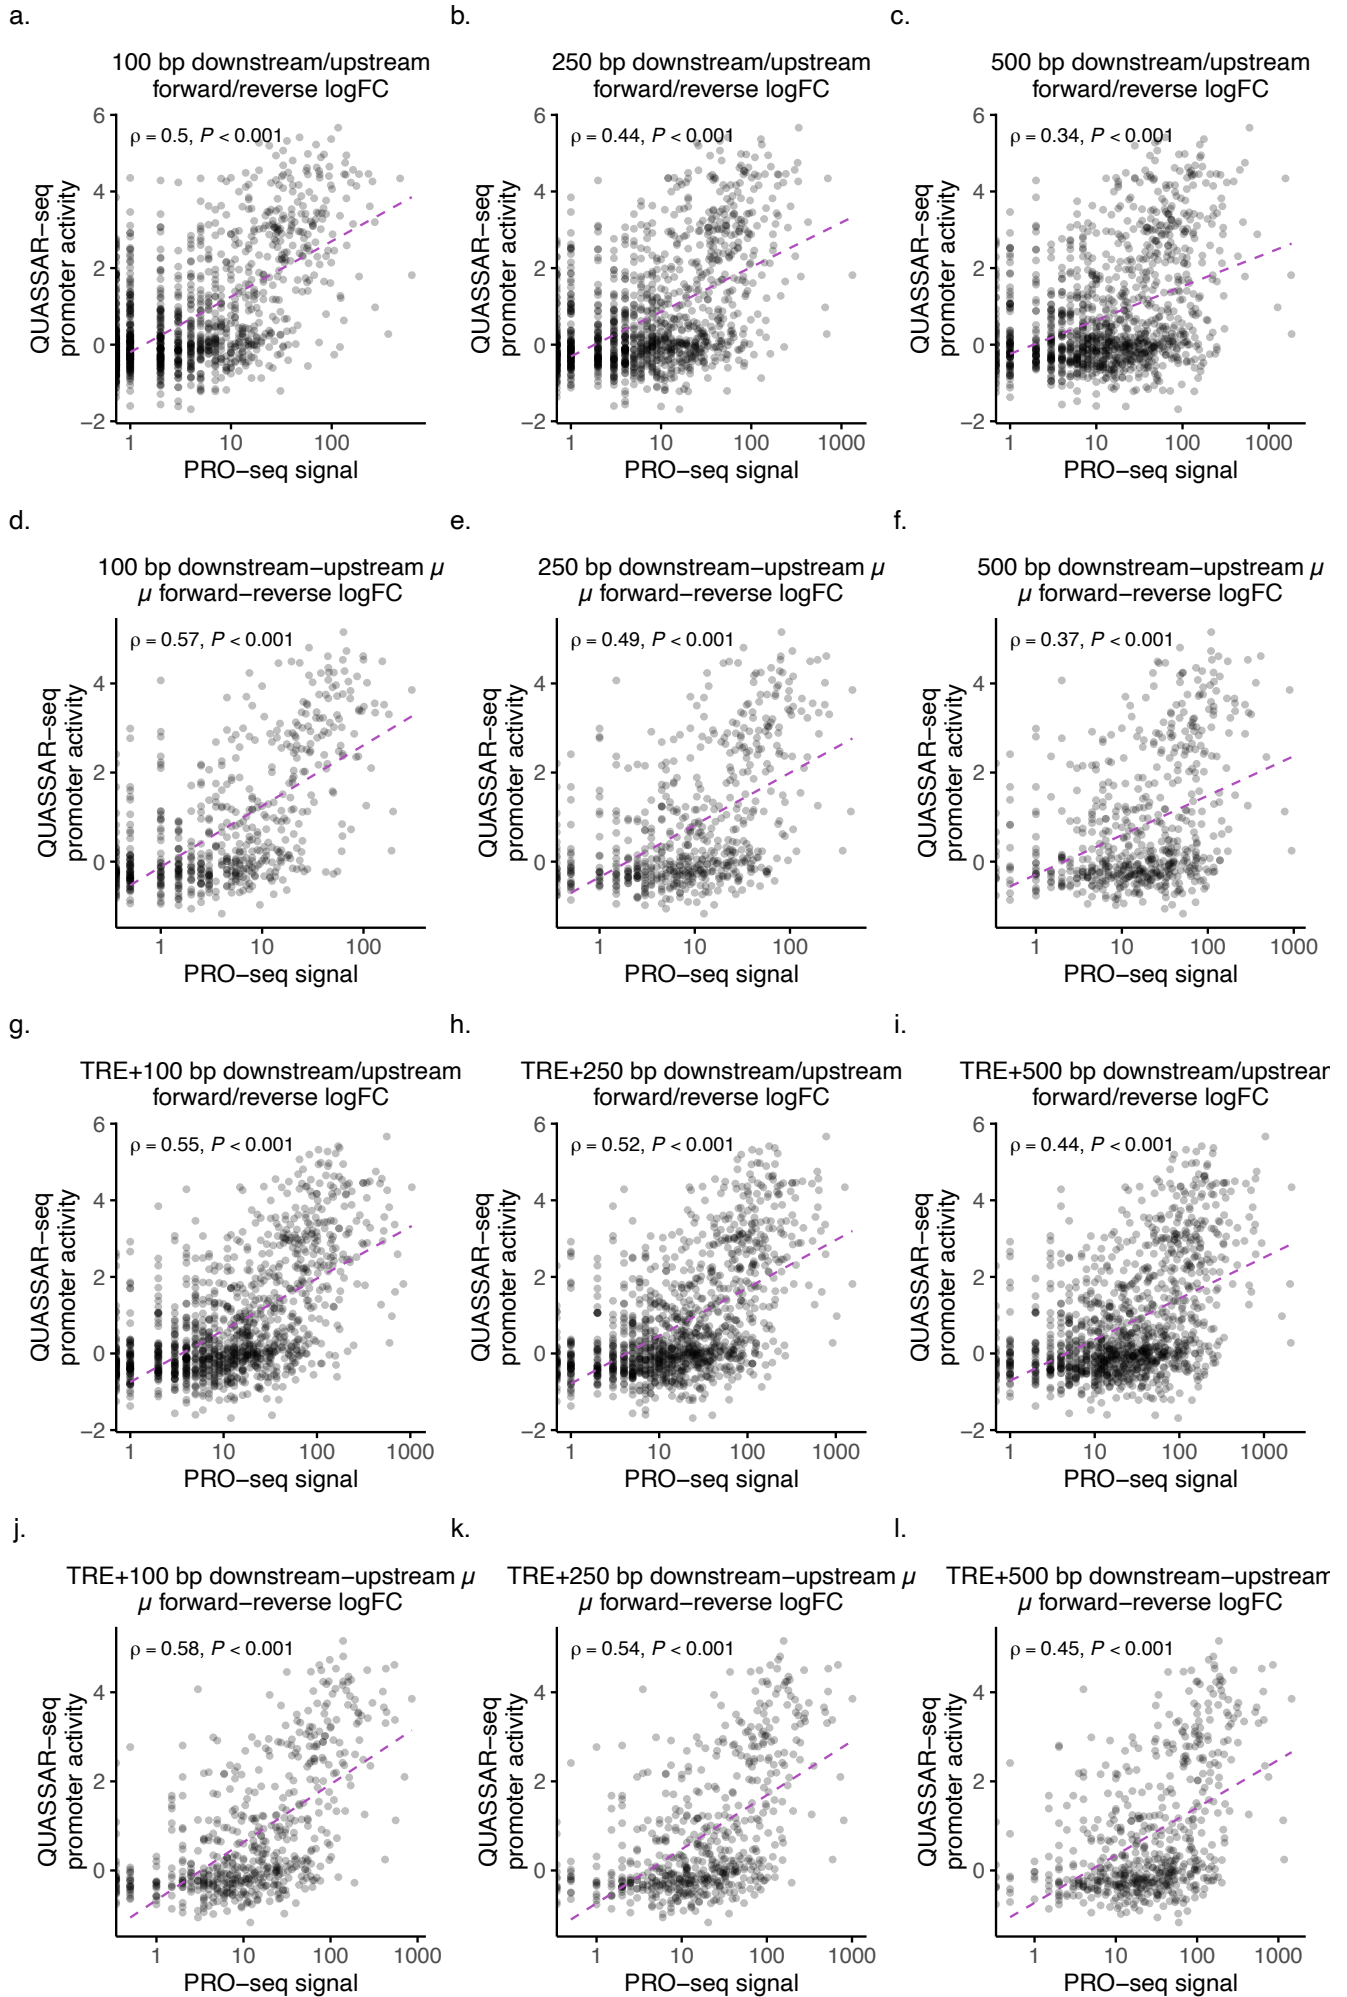

**Supplementary Fig. 1: QUASARR-seq promoter activity comparisons with PRO-seq signal.**

**a-c**, Correlation between QUASARR-seq promoter activity, with elements in forward and reverse orientation treated as separate, and downstream (for forward) and upstream (for reverse) PRO-seq signal 100 (a), 250 (b), or 500 (c) bp from element. **d-f**, Correlation between QUASARR-seq promoter activity, using the mean of elements in forward and reverse orientation, and the mean of downstream and upstream PRO-seq signal 100 (d), 250 (e), or 500 (f) bp from element. **g-i**, Correlation between QUASARR-seq promoter activity, with elements in forward and reverse orientation treated as separate, and PRO-seq signal within the element and a 100 (g), 250 (h), or 500 (i) bp extension downstream (for forward) and upstream (for reverse) from element. **j-l**, Correlation between QUASARR-seq promoter activity, using the mean of elements in forward and reverse orientation, and PRO-seq signal within the element and the mean of downstream and upstream of 100 (j), 250 (k), or 500 (l) bp extensions from element. Spearman's rank correlation coefficient.

a.

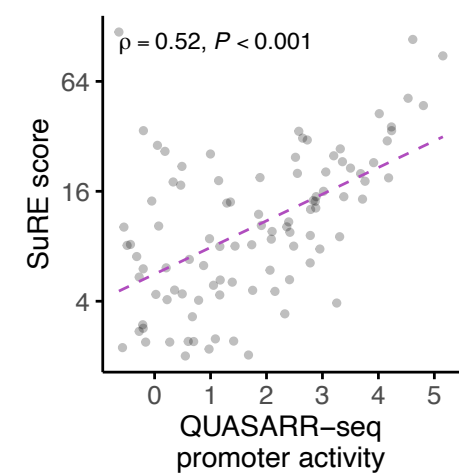

b.

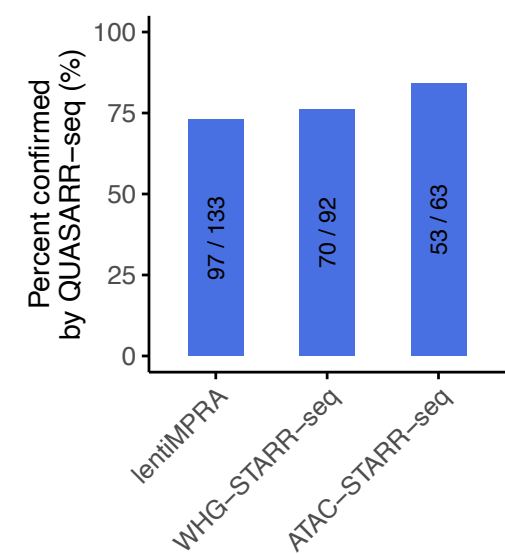

**Supplementary Fig. 2: QUASARR-seq activity benchmarking with orthogonal assays.**

- 15 **a**, Correlation between QUASARR-seq promoter activity and Survey of Regulatory Elements (SuRE) score (Spearman's  $\rho = 0.52$ ,  $P$ -value  $< 0.001$ ). **b**, Percent confirmed of lentiMPRA, WHG-STARR-seq, and ATAC-STARR-seq active enhancers by QUASARR-seq. Calculated based on 50% reciprocal overlap between elements across assays.

a.

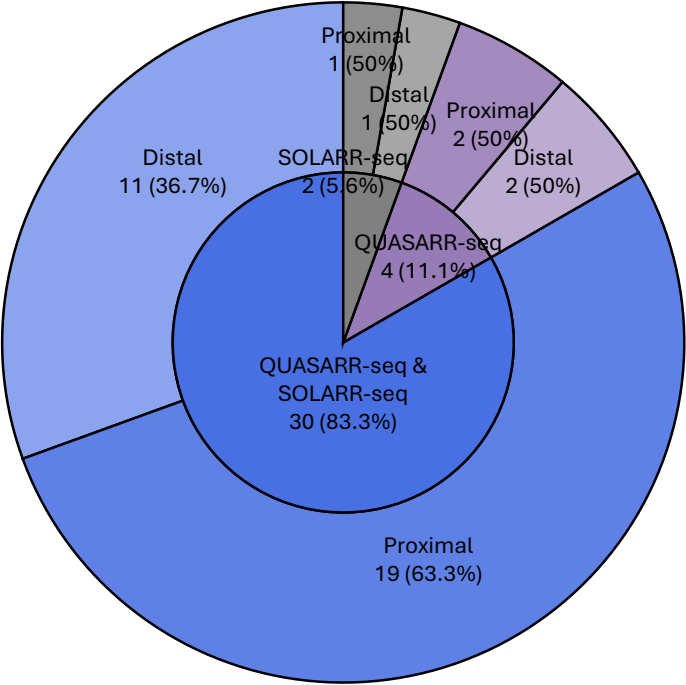

**Supplementary Fig. 3: Downstream sequence features do not establish element type.**

20 **a**, Active enhancer calls by QUASARR-seq and SOLARR-seq parsed by GENCODE class.

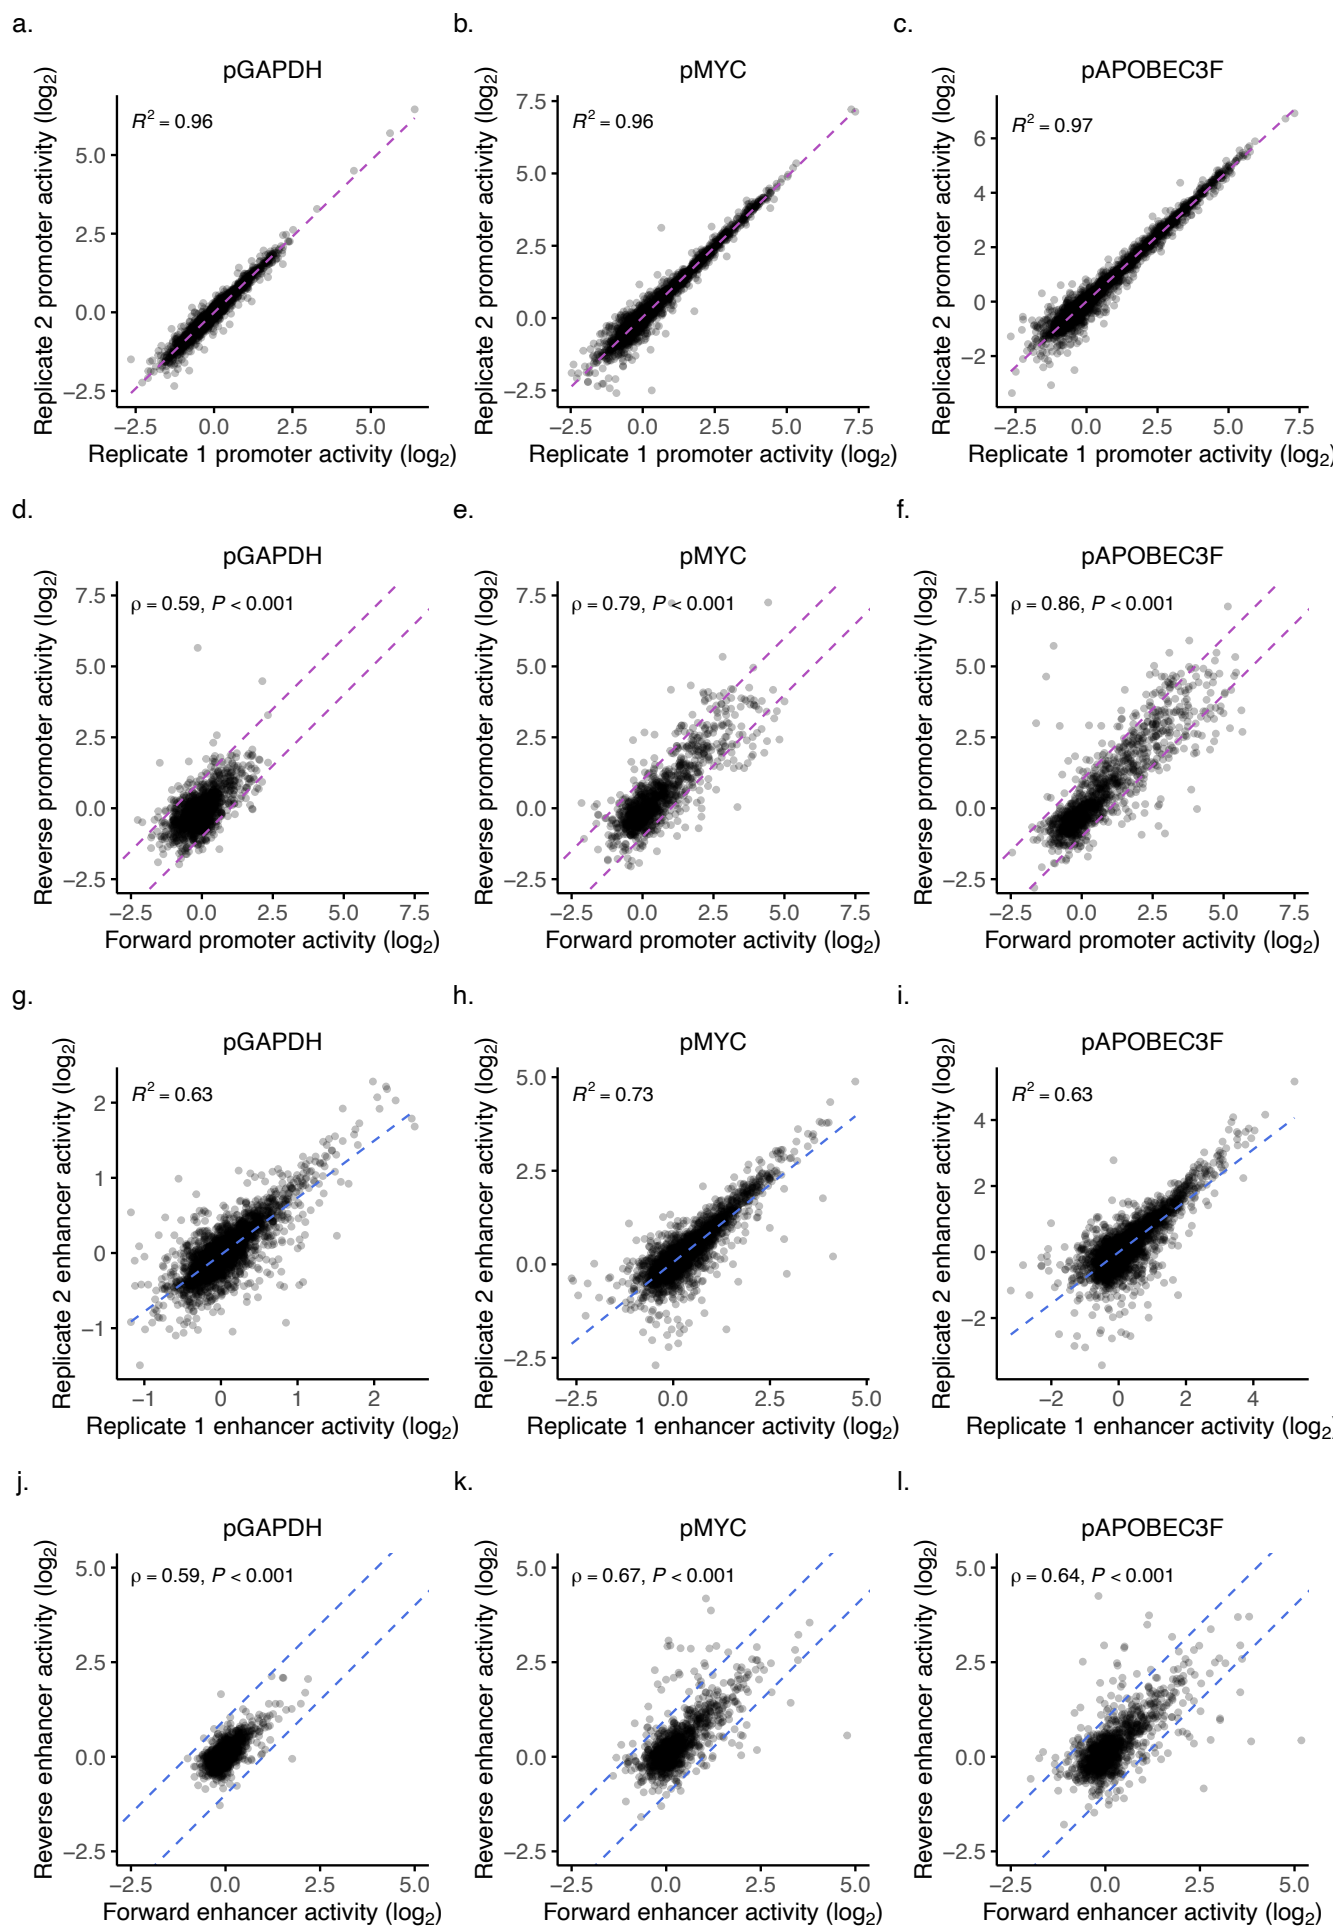

**Supplementary Fig. 4: minP QUASARR-seq data quality metrics.**

**a-c**, Correlation of QUASARR-seq promoter activity measurements between replicates when paired with pGAPDH (a), pMYC (b), and pAPOBEC3F (c). **d-f**, Correlation of QUASARR-seq promoter activity measurements between elements cloned in forward and reverse orientations when paired with pGAPDH (d), pMYC (e), and pAPOBEC3F (f). **g-i**, Correlation of QUASARR-seq enhancer activity measurements between replicates when paired with pGAPDH (g), pMYC (h), and pAPOBEC3F (i). **j-l**, Correlation of QUASARR-seq enhancer activity measurements between elements cloned in forward and reverse orientations when paired with pGAPDH (j), pMYC (k), and pAPOBEC3F (l).



a.

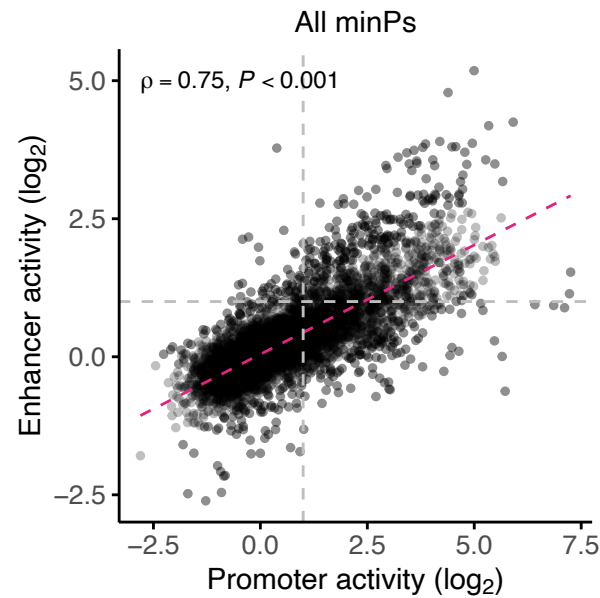

b.

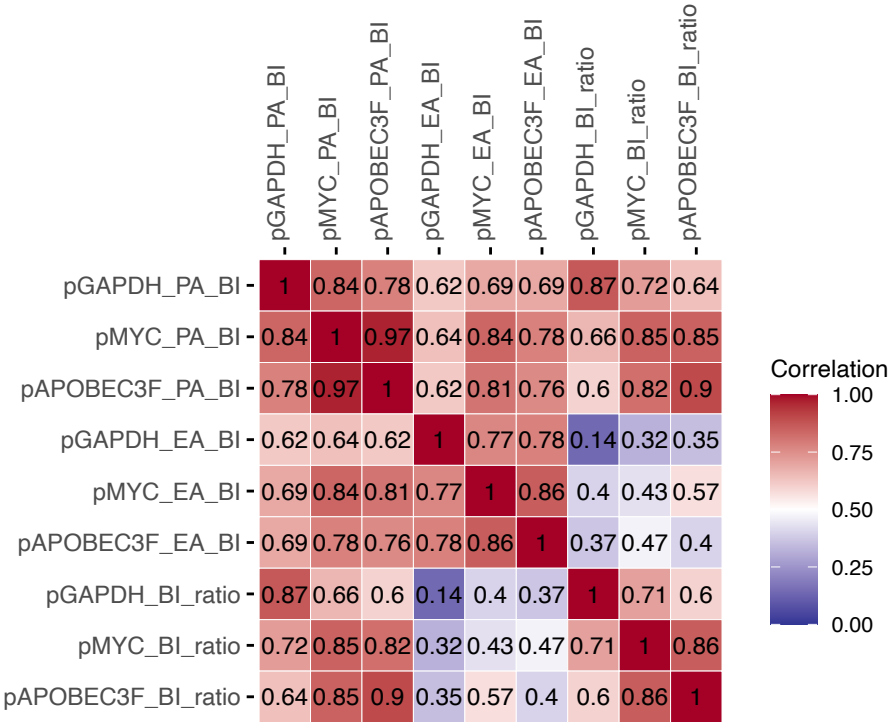

30 **Supplementary Fig. 5: Comparisons of the different minP QUASARR-seq datasets.**  
**a**, Correlation between element promoter and enhancer activities when paired with all minPs (Spearman's  $\rho = 0.75$ ,  $P$ -value  $< 0.001$ ). **b**, Heatmap showing correlation between promoter activity (PA), enhancer activity (EA), and boost index (BI) ratio of elements when paired with the minPs pGAPDH, pMYC, and pAPOBEC3F.
